# Supplementary material for: Deep eutectic solvents as novel extraction media for protein partitioning
Source: Royal Society of Chemistry journal article supplement (doi:10.1039/c3an02235h), 2014-01-01
Supplement: c3an02235h1.pdf [file c3an02235h1.pdf]

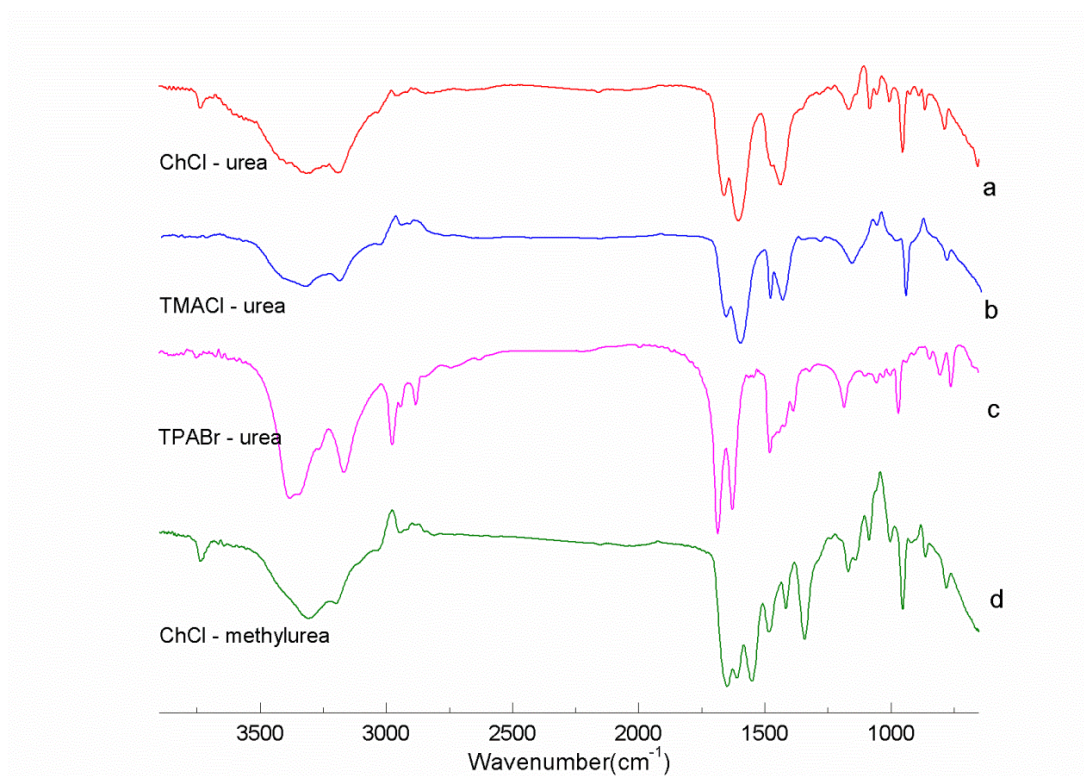

**Figure S1.** The FT-IR spectra of the four deep eutectic solvents.

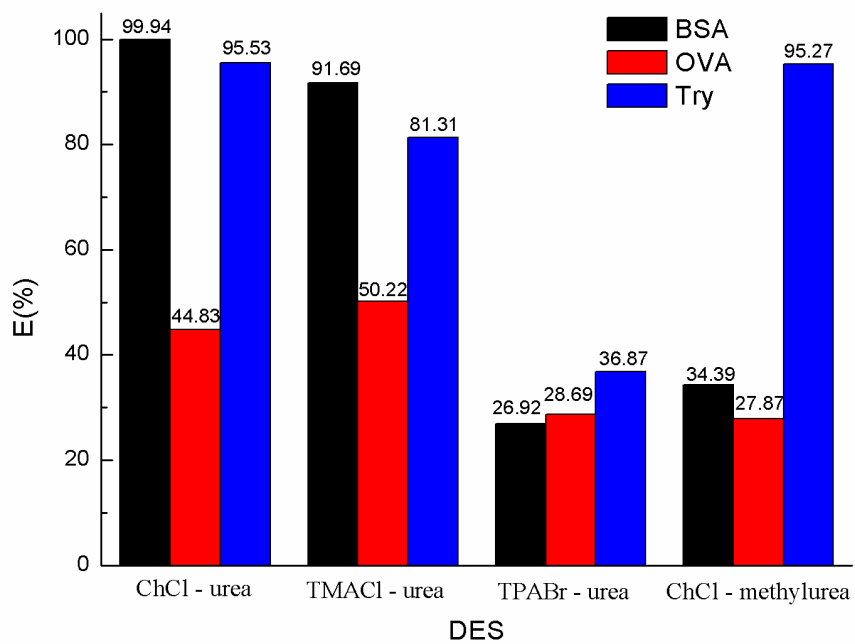

**Figure S2. Selection of deep eutectic solvents in proteins separation.**

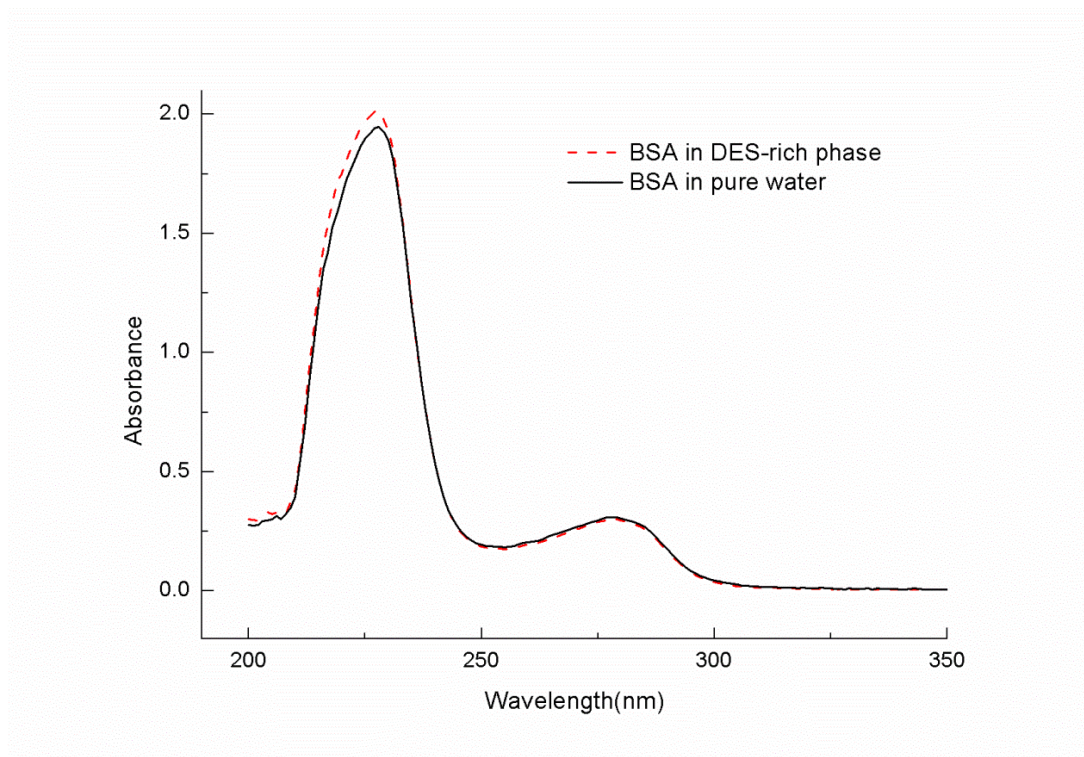

**Figure S3. UV-vis spectra of BSA in pure water and in DES-rich top phase after extraction.**
